# Supplementary material for: Association of Circulating Ceramides With Cardiac Structure and Function in the Community: The Framingham Heart Study
Source: PubMed Central journal article supplement — J Am Heart Assoc. 2019 Sep 24;8(19):e013050. doi: 10.1161/JAHA.119.013050 (PMC6806035; doi:10.1161/jaha.119.013050), 2019-09-24

# **SUPPLEMENTAL MATERIAL**

**Figure S1.** Least squared mean plots per tertile of C16/24 ratio for: Left ventricular (LV) global circumferential strain; LV mass; Left atrial emptying fraction; LV ejection fraction. Models were adjusted for the following covariates: age, sex, heart rate, height, weight, diabetes, systolic blood pressure, antihypertensive medication use, current smoking, estimated glomerular filtration rate, and total/HDL cholesterol ratio.

Per tertile of C16:0/24:0 ratio there was a linear trend towards worse GCS and lower LAEF. In contrast, there was a non-linear trend between LVM and C16:0/24:0. A propensity towards a trend was observed (albeit non-significant) of lower LVEF per tertile of C16:0/24:0 ratio.

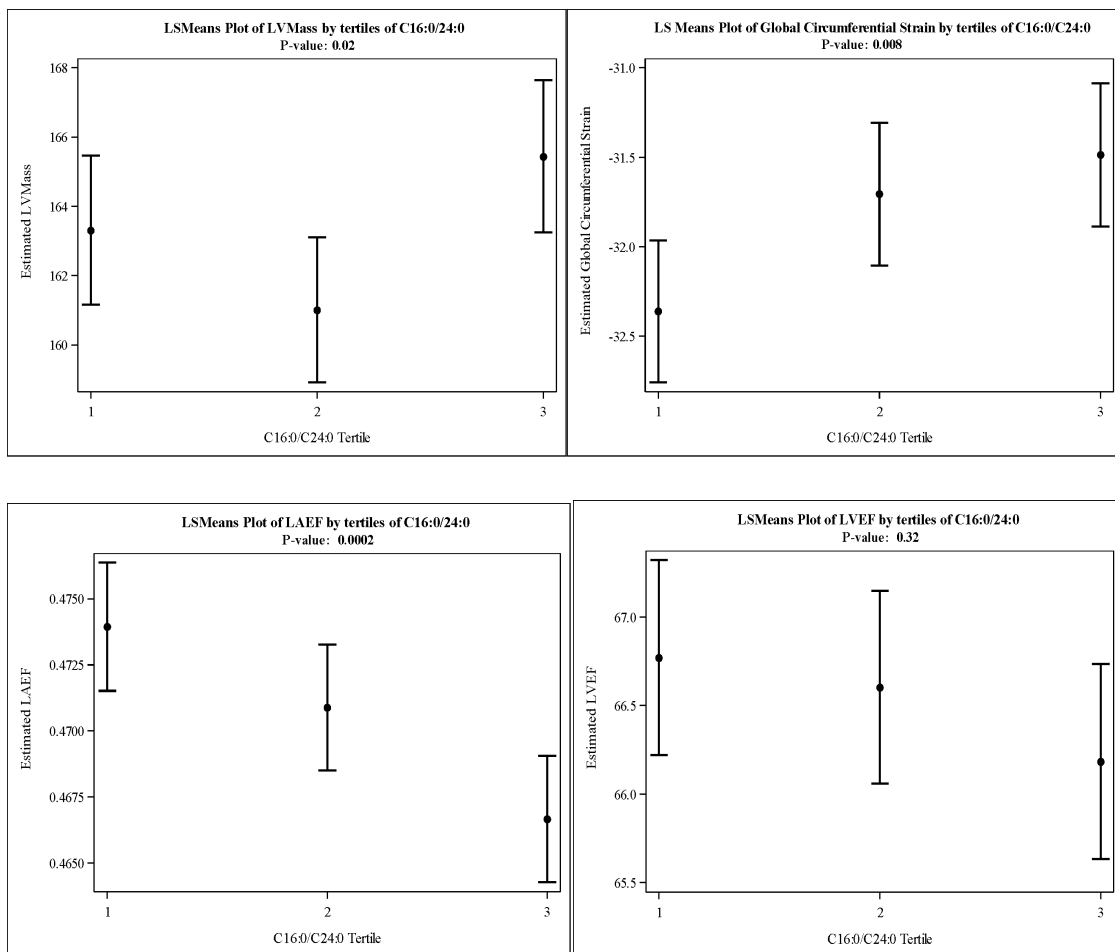

Supplement: JAH3-8-e013050-s001.pdf [file JAH3-8-e013050-s001.pdf]
